# Supplementary material for: Chemical Transformation of α-Pinene derived Organosulfate via Heterogeneous OH Oxidation: Implications for Sources and Environmental Fates of Atmospheric Organosulfates
Source: Copernicus journal article supplement (doi:10.5194/acp-2021-953), 2021-12-15
Supplement: Supplementary file 1 [file acp-2021-953-supplement.pdf]

**Supporting Information of**  
**Chemical Transformation of  $\alpha$ -Pinene derived Organosulfate via**  
**Heterogeneous OH Oxidation: Implications for Sources and**  
**Environmental Fates of Atmospheric Organosulfates**

Rongshuang Xu<sup>1</sup>, Sze In Madeleine Ng<sup>1</sup>, Wing Sze Chow<sup>2</sup>, Yee Ka Wong<sup>3</sup>, Yuchen Wang<sup>2</sup>, Donger Lai<sup>1</sup>, Zhongping Yao<sup>4</sup>, Pui-Kin So<sup>4</sup>, Jian Zhen Yu<sup>2\*</sup>, and Man Nin Chan<sup>1,5\*</sup>

<sup>1</sup>Earth System Science Programme, Faculty of Science, The Chinese University of Hong Kong, Hong Kong, China

<sup>2</sup>Department of Chemistry, The Hong Kong University of Science and Technology, Hong Kong, China

<sup>3</sup>Division of Environment and Sustainability, The Hong Kong University of Science and Technology, Hong Kong, China

<sup>4</sup>The University Research Facility in Life Sciences, The Hong Kong Polytechnic University, Hong Kong, China

<sup>5</sup>The Institute of Environment, Energy, and Sustainability, The Chinese University of Hong Kong, Hong Kong, China

*\*Corresponding to:* Jian Zhen Yu ([jian.yu@ust.hk](mailto:jian.yu@ust.hk)); Man Nin Chan ([mnchan@cuhk.edu.hk](mailto:mnchan@cuhk.edu.hk))

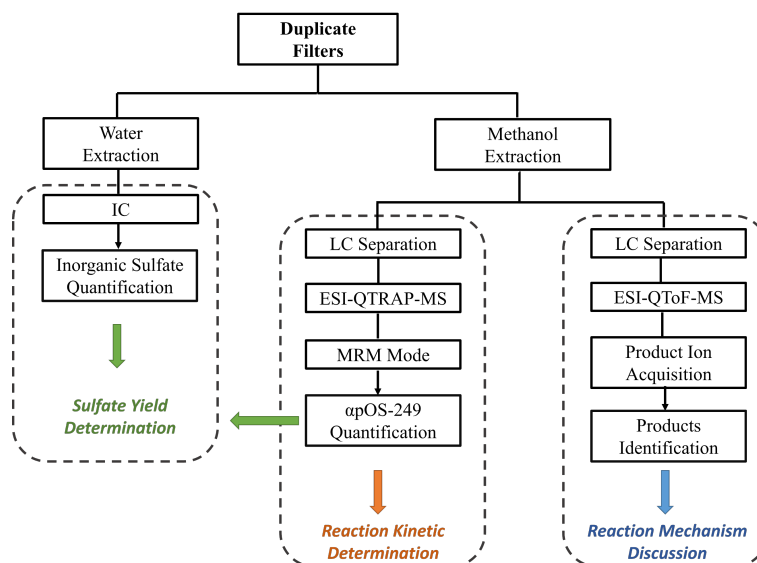

**Scheme S1.** An overview of the chemical analysis performed in this work.

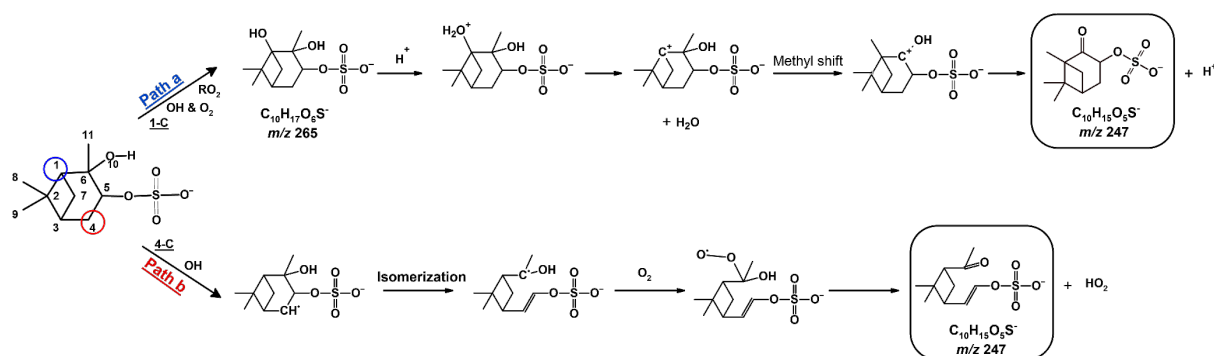

**Scheme S2.** Possible formation mechanisms for  $m/z = 247$  ( $C_{10}H_{15}O_5S^-$ ) ion.

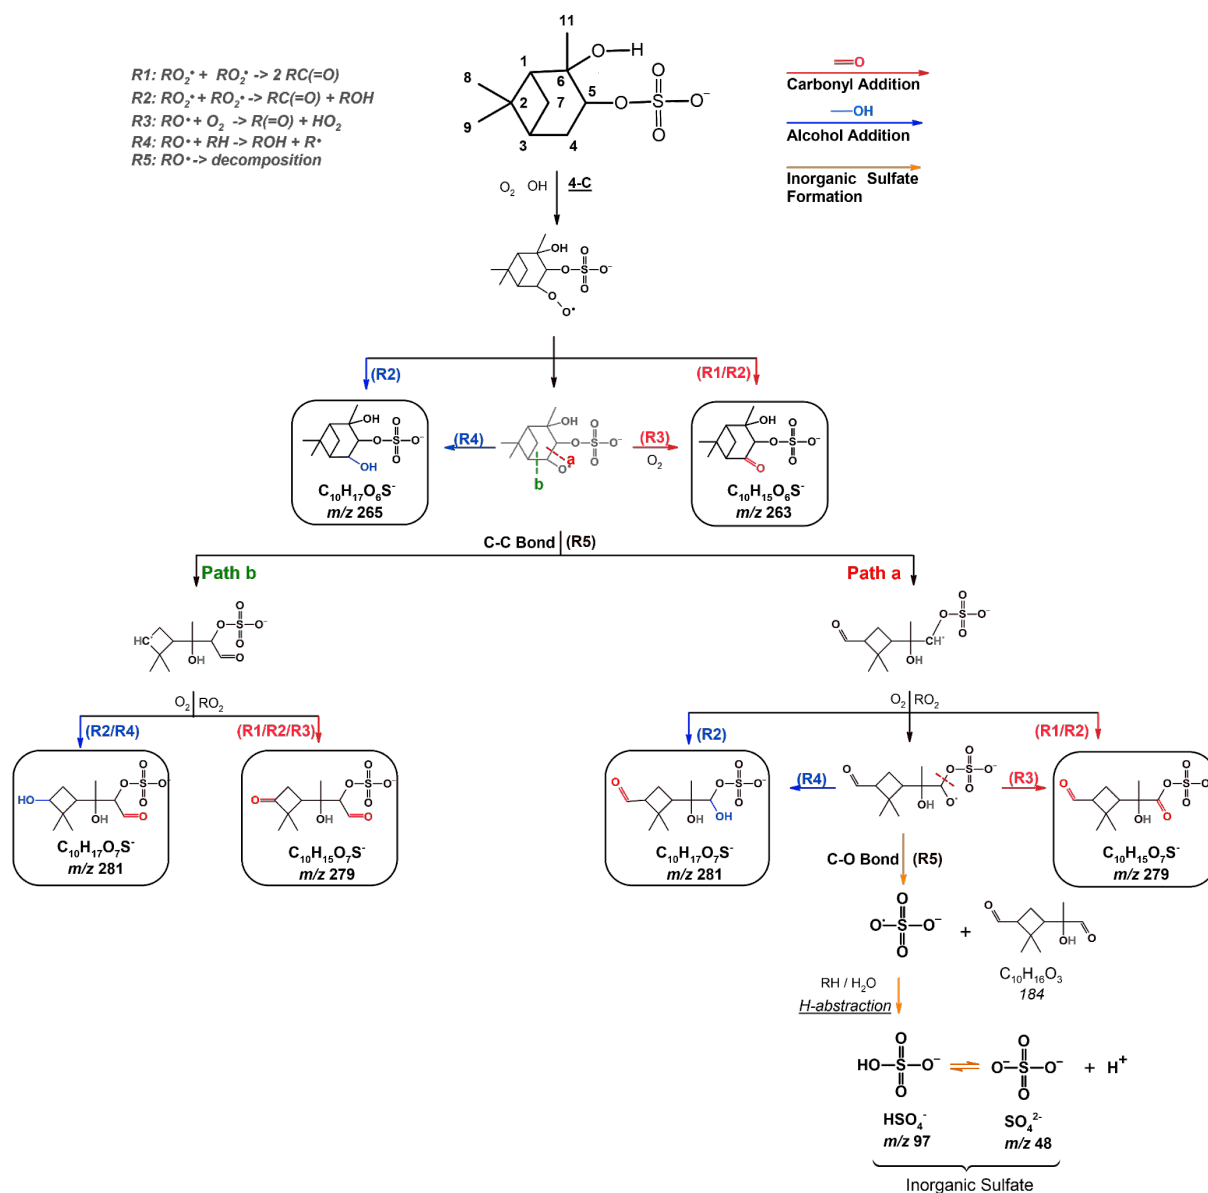

**Scheme S3.** Formation mechanisms tentatively proposed for the formation of more oxygenated OSs ( $m/z = 279$  and  $281$ ) and inorganic sulfates involving the decomposition of alkoxy radicals.

**Table S1.** MS parameters of MRM transition for quantifying  $\alpha$ pOS-249.

| Analyst                        | Products ion     | Mass transition | DP <sup>a</sup><br>(volts) | EP <sup>b</sup><br>(volts) | CE <sup>c</sup><br>(volts) | CXP <sup>d</sup><br>(volts) | MDL <sup>e</sup><br>(ng/mL) | LOQ <sup>e</sup><br>(ng/mL) |
|--------------------------------|------------------|-----------------|----------------------------|----------------------------|----------------------------|-----------------------------|-----------------------------|-----------------------------|
| $\alpha$ pOS-249               | $\text{HSO}_4^-$ | 249/97          | -95.51                     | -7.79                      | -37.34                     | -14.97                      | 2.95                        | 9.82                        |
| D <sub>17</sub> -octyl sulfate | $\text{HSO}_4^-$ | 225/97          | -83.46                     | -9.05                      | -25.97                     | -5.98                       | -                           | -                           |

<sup>a</sup>DP: declustering potential., <sup>b</sup> EP: entrance potential., <sup>c</sup> CE: collision energy, <sup>d</sup> CXP: collision cell exit potential. <sup>e</sup> Method detection limit defined as 3-fold standard deviation of 10 ng/mL standard solution signals and limit of quantification defined as 10-fold standard deviation of 10 ng/mL standard solution signals. And these values were obtained by Wang et al. (2017) using the same instrument and similar detection conditions.

**Table S2.** The hydrogen abstraction rate for different reaction sites of  $\alpha$ pOS-249 predicted by the SAR model developed by Monod and Doussin (2008)\*.

| Name                 | $\alpha$ pOS-249 |                                                                                 |
|----------------------|------------------|---------------------------------------------------------------------------------|
| Chemical structure   |                  |                                                                                 |
|                      | Reaction site    | Rate<br>( $\times 10^{-13} \text{ cm}^3 \text{ molecule}^{-1} \text{ s}^{-1}$ ) |
| Primary carbon       | 8-C              | 7.50                                                                            |
|                      | 9-C              | 7.50                                                                            |
|                      | 11-C             | 2.82                                                                            |
| Secondary carbon     | 4-C              | 18.00                                                                           |
|                      | 7-C              | 14.63                                                                           |
| Tertiary carbon      | 1-C              | 6.99                                                                            |
|                      | 3-C              | 17.20                                                                           |
|                      | 5-C              | 1.29                                                                            |
| Hydroxyl (-OH) group | 10-O             | 1.48                                                                            |

\* It is noted that the SAR model does not include the parameterization of sulfate group. As a first approximation, the effect of sulfate group on the reactivity is evaluated using the descriptor of carboxylate anion ( $\text{COO}^-$ ).

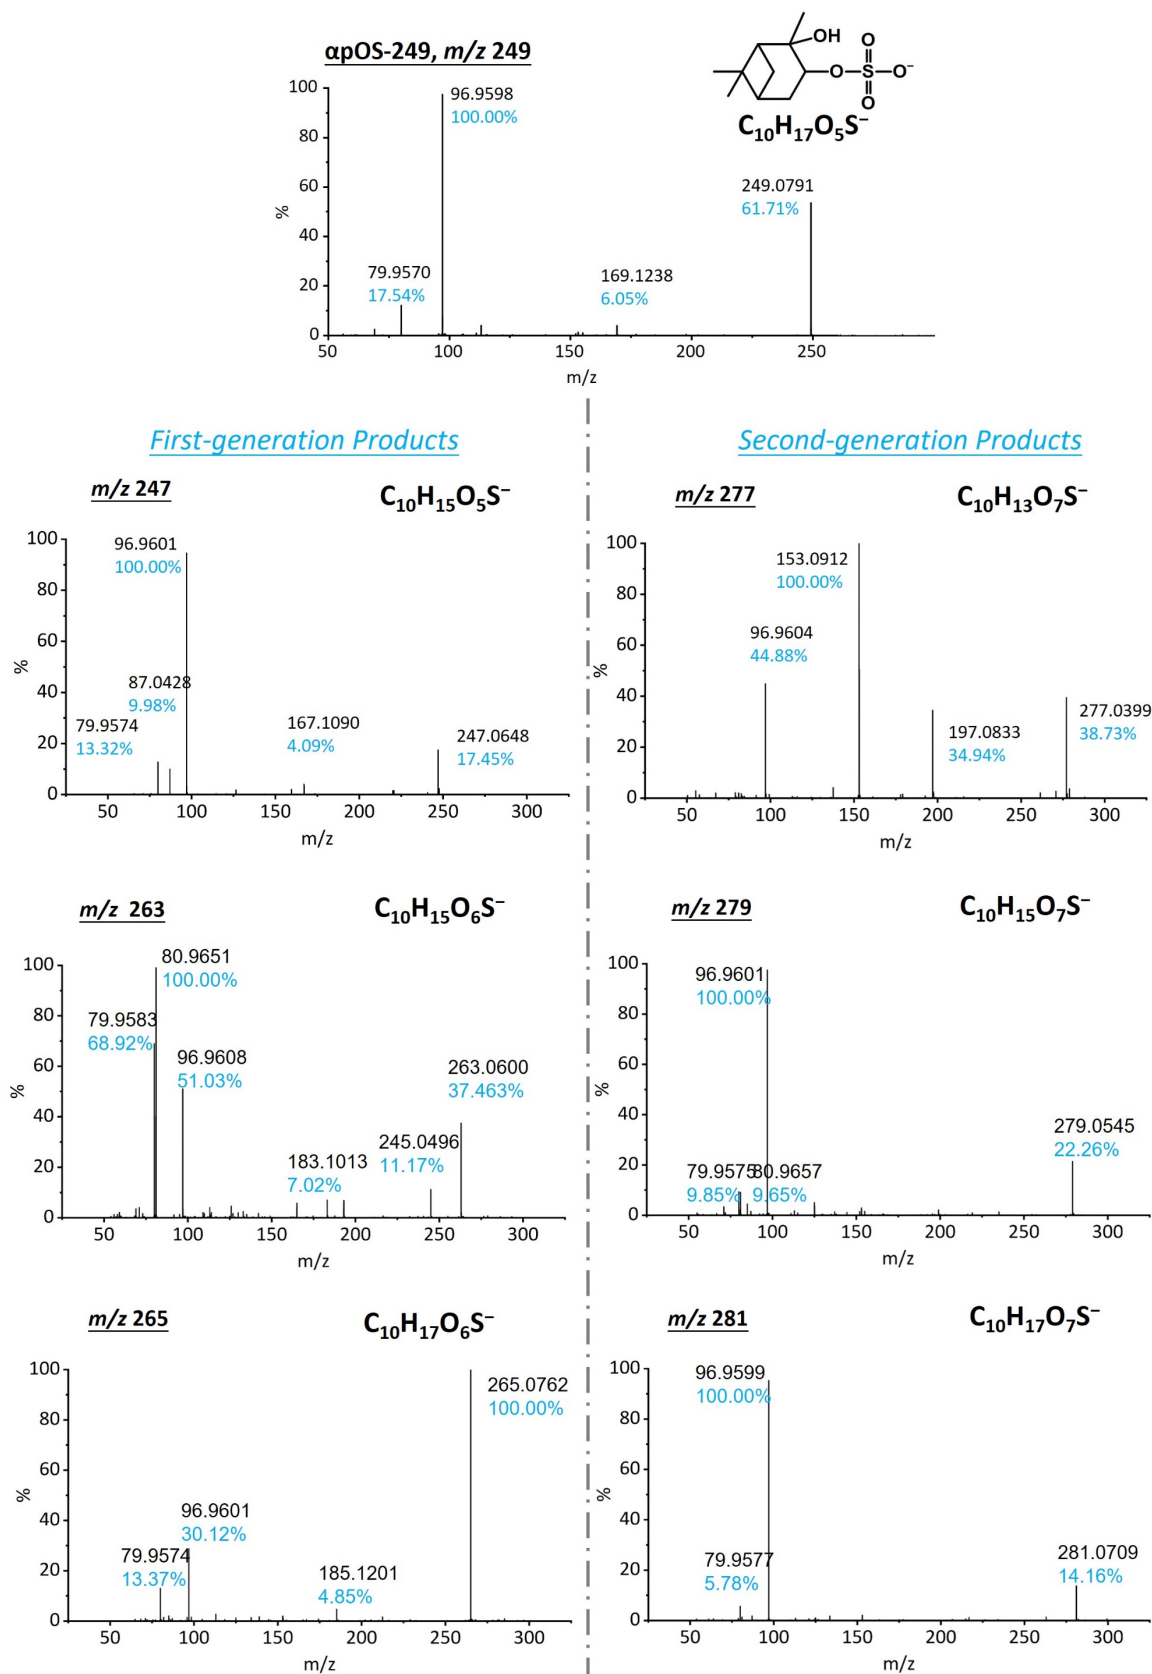

**Figure S1.** MS<sup>2</sup> spectrum for  $\alpha$ pOS-249 and reaction products in the HPLC/ESI-QToF-MS/MS measurements.

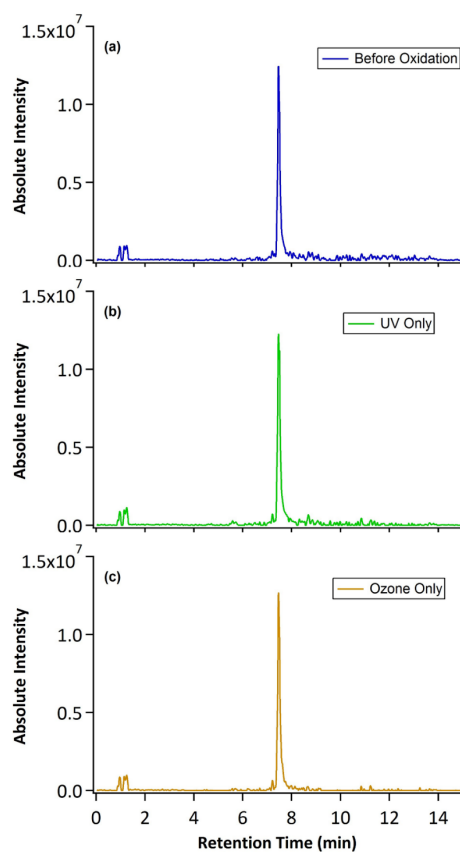

**Figure S2.** The total ion chromatograms (TICs) of  $\alpha$ pOS-249 aerosols characterized by the HPLC/ESI-QToF-MS to examine the effects of UV light and ozone on  $\alpha$ pOS-249 in control experiments.

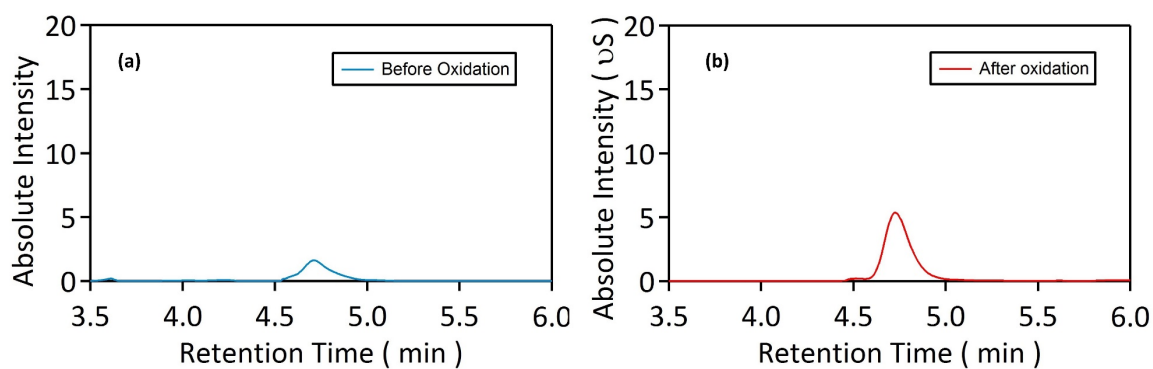

**Figure S3.** The ion chromatograms before (a) and after (b) heterogeneous OH oxidation of  $\alpha$ pOS-249.

## Determination of measurement uncertainties:

### The uncertainty for the quantification of $\alpha$ pOS-249 ( $C_{10}H_{17}O_5S^-$ ) and sulfate ( $SO_4^{2-}$ ) ion

Measurement precisions for the concentration of species  $i$  ( $\sigma_{Ci}$ ) are propagated from precisions of volumetric measurements, chemical composition measurements, and blank sample variability and sample repeatability referring to Bevington et al. (1993), and Williams et al. (2012). For simplicity, the following equations are used to calculate the uncertainty associated with our filter-based measurements:

$$C_i = \frac{M_i - B_i}{V} \quad (1)$$

$$B_i = \frac{1}{n} \sum_{j=1}^n B_{ij} \text{ for } B_i > \sigma_{B_i} \quad (2)$$

$$B_i = 0 \text{ for } B_i \leq \sigma_{B_i} \quad (3)$$

$$\sigma_{B_i} = STD_{B_i} = \left[ \frac{1}{n-1} \sum_{j=1}^n (B_{ij} - B_i)^2 \right]^{\frac{1}{2}} \text{ for } STD_{B_i} > SIG_{B_i} \quad (4)$$

$$\sigma_{B_i} = STD_{B_i} = \left[ \frac{1}{n} \sum_{j=1}^n (\sigma_{B_{ij}})^2 \right]^{\frac{1}{2}} \text{ for } STD_{B_i} \leq SIG_{B_i} \quad (5)$$

$$\frac{\sigma_V}{V} = 0.05 \quad (6)$$

$$\sigma_{C_i} = \left[ \frac{\sigma_{M_i}^2 + \sigma_{B_i}^2}{V^2} + \frac{\sigma_V^2 (M_i - B_i)^2}{V^4} \right]^{\frac{1}{2}} \quad (7)$$

where

$B_i$  = average amount of species  $i$  on blank samples

$B_{ij}$  = the amount of species  $i$  found on blank sample  $j$

$C_i$  = the concentration of species  $i$

$M_i$  = amount of species  $i$  on the substrate

$n$  = total number of samples in the sum

$SIG_{B_i}$  = the root mean square error (RMSE), the square root of the averaged sum of the squared  $\sigma_{B_{ij}}$

$STD_{B_i}$  = standard deviation of the blank samples

$\sigma_{B_i}$  = blank precision for species  $i$

$\sigma_{B_{ij}}$  = precision of the species  $i$  found on blank sample  $j$

$\sigma_{C_i}$  = propagated precision for the concentration of species  $i$

$\sigma_{M_i}$  = precision of amount of species  $i$  on the substrate

$\sigma_V$  = precision of sample volume

$V$  = sample volume

The precisions ( $\sigma_{Mi}$ ) were determined from duplicate analysis of samples. When duplicate sample analysis is made, the range of results,  $R$ , is nearly as efficient as the standard deviation since two measures differ by a constant ( $1.128\sigma_{Mi} = R$ ). Based on the blank samples and duplicate samples, coefficients needed for determining uncertainty are given in following table:

| Species               | Quantification method | No. of Blanks | No. of duplicate standard | Blank Precision ( $\sigma_{Bi}$ , mg) | Duplicate Precision ( $\sigma_{Mi}$ , mg) |
|-----------------------|-----------------------|---------------|---------------------------|---------------------------------------|-------------------------------------------|
| $\alpha$ pOS-249      | HPLC/ESI-QTRAP-MS     | 3             | 3                         | 0.0023                                | 0.0216                                    |
| Sulfate/<br>bisulfate | IC                    | 3             | 3                         | 0.0019                                | 0.0017                                    |



### The uncertainty for the yield, $\sigma_{yield_j}$

$$\sigma_{yield_j} = \left[ \frac{\sigma_{apOS-249_j}^2 + \sigma_{apOS-249_0}^2}{(\alpha pOS - 249_0 - \alpha pOS - 249_j)^2} + \frac{\sigma_{sulfate_j}^2 + \sigma_{sulfate_0}^2}{(sulfate_j - sulfate_0)^2} \right]^{\frac{1}{2}} * yield_j$$

where

$\sigma_{yield_j}$  = precision of molar yield on sample  $j$

$\sigma_{apOS-249_j}$  = precision of apOS-249 on sample  $j$

$\sigma_{apOS-249_0}$  = precision of apOS-249 on first sample (prior to oxidation)

$\sigma_{sulfate_j}$  = precision of sulfate on sample  $j$

$\sigma_{sulfate_0}$  = precision of sulfate on first sample (prior to oxidation)

$\alpha pOS - 249_0$  = the amount of apOS-249 on first sample (prior to oxidation)

$\alpha pOS - 249_j$  = the amount of apOS-249 on sample  $j$

$yield_j$  = molar yield for sample  $j$

### The uncertainty for OH exposure, $\sigma_{exp}$

$$\sigma_{exp} = 0.005 (OH \text{ exposure}) \sqrt{\left( 16 + \frac{2}{(OH \text{ exposure} \times k_{SO_2})^2} \right)}$$

where 0.005 is the precision of SO<sub>2</sub> analyzer (0.5 % of the reading),  $k_{SO_2}$  is the second-order rate constant of the gas-phase OH and SO<sub>2</sub> reaction:  $9 \times 10^{-13}$ , cm<sup>3</sup> molecule<sup>-1</sup> s<sup>-1</sup>.

### The uncertainty for parent decay index, $\sigma_{\frac{I}{I_0}}$

$$\sigma_{\frac{I}{I_0}} = \frac{I}{I_0} \times \sqrt{\left( \frac{\sigma_I}{I} \right)^2 + \left( \frac{\sigma_{I_0}}{I_0} \right)^2}$$

where  $I$  is the concentration of apOS-249 at a given OH exposure,  $I_0$  is the concentration of apOS-249 before oxidation,  $\sigma_I$  is the uncertainty of apOS-249 on sample at a given OH exposure.

### The uncertainty for atmospheric lifetime, $\sigma_{\tau}$

$$\sigma_{\tau} = \tau \sqrt{\left( \frac{\sigma_k}{k} \right)^2}$$

where  $k$  is the fitted heterogeneous OH rate constant.

## References

- Bevington, P. R., Robinson, D. K., Blair, J. M., Mallinckrodt, A. J., and McKay, S.: Data Reduction and Error Analysis for the Physical Sciences, *Computers in Phys.*, 7, 415–416 <https://doi.org/10.1063/1.4823194>, 1993.
- Ellison, S. L. R., Williams A (Eds. 3rd). Eurachem/CITAC guide: Quantifying Uncertainty in Analytical Measurement, 2012.
- Wang, Y., Ren, J., Huang, X. H. H., Tong, R., and Yu, J. Z.: Synthesis of Four Monoterpene-Derived Organosulfates and Their Quantification in Atmospheric Aerosol Samples, *Environ. Sci. Technol.*, 51, 6791–6801, <https://doi.org/10.1021/acs.est.7b01179>, 2017.
